# Supplementary material for: Correction of Dystrophin Expression in Cells From Duchenne Muscular Dystrophy Patients Through Genomic Excision of Exon 51 by Zinc Finger Nucleases
Source: PubMed Central journal article supplement (PMC4351462; doi:10.1038/mt.2014.234), 2015-01-13
Supplement: mt2014234x1.pdf [file mt2014234x1.pdf]

**Correction of Dystrophin Expression in Cells from Duchenne Muscular Dystrophy Patients through Genomic Excision of Exon 51 by Zinc Finger Nucleases**

David G. Ousterout<sup>1</sup>, Ami M. Kabadi<sup>1</sup>, Pratiksha I. Thakore<sup>1</sup>, Pablo Perez-Pinera<sup>1</sup>, Matthew T. Brown<sup>1</sup>, William H. Majoros<sup>4</sup>, Timothy E. Reddy<sup>2,5</sup>, Charles A. Gersbach<sup>1-3</sup>

<sup>1</sup>Department of Biomedical Engineering, Duke University, Durham, North Carolina, United States of America, 27708

<sup>2</sup>Center for Genomic and Computational Biology, Duke University, Durham, North Carolina, United States of America, 27708

<sup>3</sup>Department of Orthopaedic Surgery, Duke University Medical Center, Durham, North Carolina, United States of America, 27710

<sup>4</sup>Program in Computational Biology and Bioinformatics, Duke University, Durham, North Carolina, United States of America, 27708

<sup>5</sup>Department of Biostatistics and Bioinformatics, Duke University Medical Center, Durham, North Carolina, United States of America, 27710

\* Address for correspondence:

Charles A. Gersbach, Ph.D.

Department of Biomedical Engineering

Room 136 Hudson Hall, Box 90281

Duke University

Durham, NC 27708-0281

Phone: 919-613-2147

Fax: 919-668-0795

Email: [charles.gersbach@duke.edu](mailto:charles.gersbach@duke.edu)

## Table of Contents

|                                                                                                               |        |
|---------------------------------------------------------------------------------------------------------------|--------|
| <b>Supplementary Figure 1:</b> Additional immunofluorescence images probing human dystrophin expression ..... | pg. 3  |
| <b>Supplementary Table 1:</b> Sequences of ZFN target sites.....                                              | pg. 4  |
| <b>Supplementary Table 2:</b> Sequences of additional DNA recognition helices.....                            | pg. 4  |
| <b>Supplementary Table 3:</b> PROGNOS ZFN v2.0 output.....                                                    | pg. 5  |
| <b>Supplementary Table 4:</b> Deep sequencing data for on and off-target sites.....                           | pg. 6  |
| <b>Supplementary Figure 2:</b> Distribution of indel sizes by deep sequencing.....                            | pg. 7  |
| <b>Supplementary Table 5:</b> Sequences of primers used in this study.....                                    | pg. 8  |
| <b>Supplementary sequences:</b> Coding regions for all ZFNs in this study.....                                | pg. 11 |

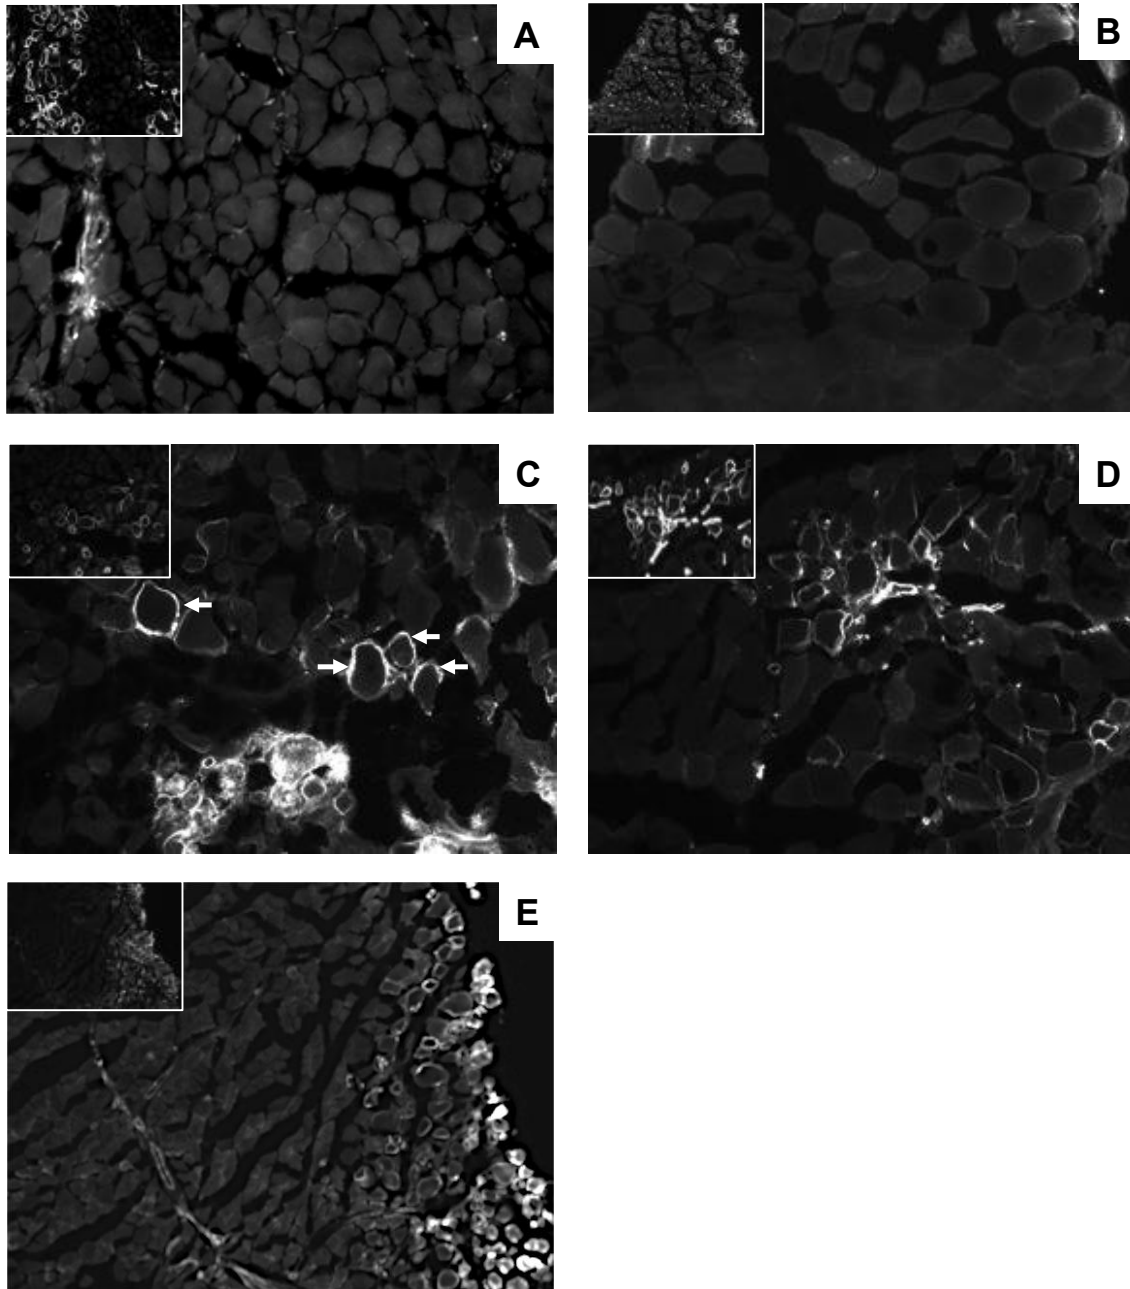

**Supplementary Figure 1:** Additional immunofluorescence images probing human dystrophin expression. Serial sections from regions stained with anti-human spectrin are shown inset in top left. (A-B) Sections from muscles injected with untreated human DMD myoblasts. (C-E) Sections from muscles injected with clonally derived DMD myoblasts carrying a deletion of exon 51 to that corrects the dystrophin reading frame. White arrows indicate examples of dystrophin positive fibers.

| ZFN target | Target site                                                                                                              | Spacer length (bp) |
|------------|--------------------------------------------------------------------------------------------------------------------------|--------------------|
| DZF-1      | 5'-CAA ACT AGA AAT GCC ATC TTCCTT GAT GTT GGA GGT ACC TGC<br>3'-GTT TGA TCT TTA CGG TAG AAGGAA CTA CAA CCT CCA TGG ACG   | 6                  |
| DZF-2      | 5'-ATG ATC ATC AAG CAG AAG GTATGA GAA AAA ATG ATA AAA GTT<br>3'-TAC TAG TAG TTC GTC TTC CATACT CTT TTT TAC TAT TTT CAA   | 6                  |
| DZF-3      | 5'-GAC TGT TAC TCT GGT GAC ACAACCT GTG GTT ACT AAG GAA ACT<br>3'-CTG ACA ATG AGA CCA CTG TGTTGGA CAC CAA TGA TTC CTT TGA | 7                  |
| DZF-4      | 5'-CTT TAC CAC TTC CAC AAT GTATATG ATT GTT ACT GAG AAG GCT<br>3'-GAA ATG GTG AAG GTG TTA CATATAC TAA CAA TGA CTC TTC CGA | 7                  |
| DZF-5      | 5'-CAC ATT CAC ATT CAC AATATA GTT ATG GAT ATG GAT GTA<br>3'-GAG TAA GTG TAA GTG TTATAT CAA TAC CTA TAC CTA CAT           | 6                  |
| DZF-6      | 5'-AAC TTC ACC AAT TCCATA GGA ATA AAA GTA ATT TGA<br>3'-TTG AAG TGG TTA AGGTAT CCT TAT TTT CAT TAA ACT                   | 6                  |
| DZF-7      | 5'-AAC CCC ATC AAAAAAGT GGG GGA AGG<br>3'-TTG GGG TAG TTTTCA CCC CCT TCC                                                 | 7                  |
| DZF-8      | 5'-ATC ATC TCC TCTGGTG GAT GAG GCT<br>3'-TAG TAG AGG AGACCAC CTA CTC CGA                                                 | 7                  |
| DZF-9      | 5'-ATC TGC CCA TGACT GGC GCA GGG<br>3'-TAG ACG GGT ACTGA CCG CGT CCC                                                     | 5                  |
| DZF-10     | 5'-GCC ATC TTC CTTGAT GTT GGA GGT<br>3'-CGG TAG AAG GAACTA CAA CCT CCA                                                   | 6                  |
| DZF-11     | 5'-TGC TTC AGC CTCCTGA GTA GCT GGG<br>3'-ACG AAG TCG GAGGACT CAT CGA CCC                                                 | 7                  |
| DZF-12     | 5'-GCC TCA GCC TCCCAA GTG GTG GGA<br>3'-CGG AGT CGG AGGGTTT CAC CAC CCT                                                  | 7                  |
| DZF-13     | 5'-CTC AGC CTC CCAA GTG GTG GGA<br>3'-GAG TCG GAG GGTTT CAC CAC CCT                                                      | 5                  |

**Supplementary Table 1:** Summary of target sites for ZFNs in this study.

| Triplet target | Helix sequence | Source           |
|----------------|----------------|------------------|
| TGC            | QRNALAG        | ZiFiT F3 ID #631 |
| TCT            | QQRSLVG        | ZiFiT F3 ID #790 |

**Supplementary Table 2:** Sequences of eMA zinc finger modules to supplement published Barbas modules.

| <b>DZF-1 L6/R6</b>                                    |     |        |     |                    |                    |       |            |            |         |
|-------------------------------------------------------|-----|--------|-----|--------------------|--------------------|-------|------------|------------|---------|
| Top ten with spacers of 6-7 (optimal for this linker) |     |        |     |                    |                    |       |            |            |         |
| OT#                                                   | HS  | Spacer | MM  | Left Site          | Right Site         | Chr   | Chr Region | Region     | Gene    |
| 1                                                     | L/R | 6      | 5/4 | CcAACTtGAgATGCCAgC | GgTGTgGGAGGTcgaTGC | chr12 | 121465217  | Intron     | OASL    |
| 2                                                     | L/L | 7      | 6/2 | CtAgCaAGAAGTcCCTTC | GATGGCAtcTCTActTTG | chr2  | 164675298  | Intergenic | -       |
| 3                                                     | L/L | 7      | 4/3 | CAAACtAtAAGTGCCgTg | GATGtCAaTtAtAGTTTg | chr6  | 3268596    | Intergenic | -       |
| 4                                                     | L/R | 6      | 6/6 | attACTtctAATGCCATC | GATaTTGGAGATataTtt | chr11 | 73441555   | Intron     | RAB6A   |
| 5                                                     | L/R | 7      | 6/6 | CAAgaacctAATGCCATC | GtcGgaGGAGTACCccc  | chr12 | 349901     | Intron     | SLC6A13 |
| 6                                                     | L/L | 7      | 6/4 | CAAaggAGAAATGCCAag | GATGGCtcTtaaAGTTgc | chr14 | 87103919   | Intergenic | -       |
| 7                                                     | R/R | 7      | 6/6 | GCAaactCCTCCAACAag | GATGTTGGAAagACaaaC | chr8  | 141637370  | Intron     | EIF2C2  |
| 8                                                     | R/L | 6      | 6/5 | cCAGaTACCcCcttaATC | GcTGGcATgTCTeccTTG | chr1  | 220550165  | Intergenic | -       |
| <b>DZF-9</b>                                          |     |        |     |                    |                    |       |            |            |         |
| Top ten with spacers of 5-6 (optimal for this linker) |     |        |     |                    |                    |       |            |            |         |
| OT#                                                   | HS  | Spacer | MM  | Left Site          | Right Site         | Chr   | Chr Region | Region     | Gene    |
| 1                                                     | R/L | 6      | 1/0 | CCCTGccc           | TGGGCAGAT          | chr6  | 12015411   | Intron     | HIVEP1  |
| 2                                                     | L/R | 6      | 1/0 | ATCTGCCCA          | GGCGCAGtG          | chr4  | 58293132   | Intergenic | -       |
| 3                                                     | R/L | 6      | 1/0 | CCCTGCGCC          | gGGGCAGAT          | chr18 | 76473917   | Intergenic | -       |
| 4                                                     | L/R | 5      | 1/0 | ATCTGCCCA          | GGCGCAagg          | chr17 | 8113802    | Intron     | AURKB   |
| 5                                                     | L/R | 5      | 1/0 | ATCTGCCCA          | GGCcCAGGG          | chr7  | 128034911  | Intron     | IMPDH1  |
| 6                                                     | R/L | 6      | 1/0 | CCCTGgGCC          | TGGGCAGAT          | chr10 | 80912948   | Intron     | ZMIZ1   |
| 7                                                     | R/L | 5      | 1/0 | CCCTGaGCC          | TGGGCAGAT          | chr4  | 1595869    | Intergenic | -       |
| 8                                                     | L/R | 6      | 1/0 | ATCTGCCCA          | GGCtCAGGG          | chr18 | 74383767   | Intergenic | -       |

**Supplementary Table 3: PROGNOS ZFN v2.0 output**

| Name            | Untreated  |                 |               |                |               | Treated    |                 |               |                |               |
|-----------------|------------|-----------------|---------------|----------------|---------------|------------|-----------------|---------------|----------------|---------------|
|                 | Indel Rate | Total Fragments | Deletion Rate | Insertion Rate | Mismatch Rate | Indel Rate | Total Fragments | Deletion Rate | Insertion Rate | Mismatch Rate |
| <b>DZF1-ON</b>  | 0.00019    | 297376          | 0.00019       | 0.00011        | 0.0254        | 0.14112    | 275038          | 0.11332       | 0.02781        | 0.03581       |
| <b>DZF1-OT1</b> | 7.00E-05   | 392992          | 6.00E-05      | 2.00E-05       | 0.02629       | 5.00E-05   | 359847          | 3.00E-05      | 1.00E-05       | 0.02705       |
| <b>DZF1-OT2</b> | 0.00013    | 367911          | 0.00013       | 1.00E-05       | 0.0227        | 0.00022    | 304631          | 0.00022       | 3.00E-05       | 0.02474       |
| <b>DZF1-OT3</b> | 0.00016    | 306797          | 0.00016       | 0              | 0.02259       | 0.00015    | 242962          | 0.00015       | 2.00E-05       | 0.01974       |
| <b>DZF1-OT4</b> | 0          | 4               | 0             | 0              | 0             | 0          | 0               | 0             | 0              | 0             |
| <b>DZF1-OT5</b> | 0.00062    | 373972          | 0.00062       | 2.00E-05       | 0.02818       | 0.00128    | 384875          | 0.00127       | 3.00E-05       | 0.02746       |
| <b>DZF1-OT6</b> | 6.00E-05   | 382279          | 6.00E-05      | 1.00E-05       | 0.02677       | 8.00E-05   | 421802          | 8.00E-05      | 3.00E-05       | 0.02671       |
| <b>DZF1-OT7</b> | 0.00017    | 253294          | 0.00017       | 2.00E-05       | 0.02339       | 0.00016    | 385648          | 0.00016       | 1.00E-05       | 0.02519       |
| <b>DZF1-OT8</b> | 0.00013    | 331031          | 0.00013       | 0              | 0.01842       | 0.00016    | 374451          | 0.00016       | 3.00E-05       | 0.01869       |
|                 |            |                 |               |                |               |            |                 |               |                |               |
| <b>DZF9-ON</b>  | 0.00035    | 283889          | 0.00027       | 9.00E-05       | 0.02109       | 0.16438    | 247862          | 0.01432       | 0.15009        | 0.02759       |
| <b>DZF9-OT1</b> | 0.00031    | 368970          | 0.00027       | 0.00011        | 0.02059       | 0.03653    | 374476          | 0.00302       | 0.03352        | 0.01934       |
| <b>DZF9-OT2</b> | 0.33649    | 211             | 0.04739       | 0.30806        | 0.22275       | 0.0098     | 816             | 0             | 0.0098         | 0.02206       |
| <b>DZF9-OT3</b> | 0.00069    | 410574          | 0.00069       | 0              | 0.01957       | 0.02129    | 316583          | 0.00071       | 0.0206         | 0.01867       |
| <b>DZF9-OT4</b> | 0.00027    | 365973          | 0.00025       | 2.00E-05       | 0.02126       | 0.04189    | 396372          | 0.00222       | 0.0397         | 0.02002       |
| <b>DZF9-OT5</b> | 0.00104    | 406244          | 0.00104       | 3.00E-05       | 0.02447       | 0.0013     | 424538          | 0.0013        | 2.00E-05       | 0.02564       |
| <b>DZF9-OT6</b> | 0.00046    | 390369          | 0.00045       | 4.00E-05       | 0.01783       | 0.00192    | 422006          | 0.00052       | 0.00141        | 0.01933       |
| <b>DZF9-OT7</b> | 0.00022    | 54247           | 0.00022       | 0              | 0.01989       | 9.00E-05   | 90803           | 9.00E-05      | 0              | 0.02159       |
| <b>DZF9-OT8</b> | 0.00071    | 378717          | 0.0007        | 0.00059        | 0.9989        | 0.00051    | 380580          | 0.00051       | 0.00044        | 0.99877       |

**Supplementary Table 4:** Summary of deep sequencing data. The DMD myoblasts were transfected with constructs encoding the DZF-1 or DZF-9 ZFNs. The frequency of indel formation at each target site (ON, bold) and eight of the top ten predicted off-target sites (OT1-8) was determined by deep sequencing. Two off-target sites (DZF1-OT4 and DZF9-OT2) did not produce reads that met filtering criteria.

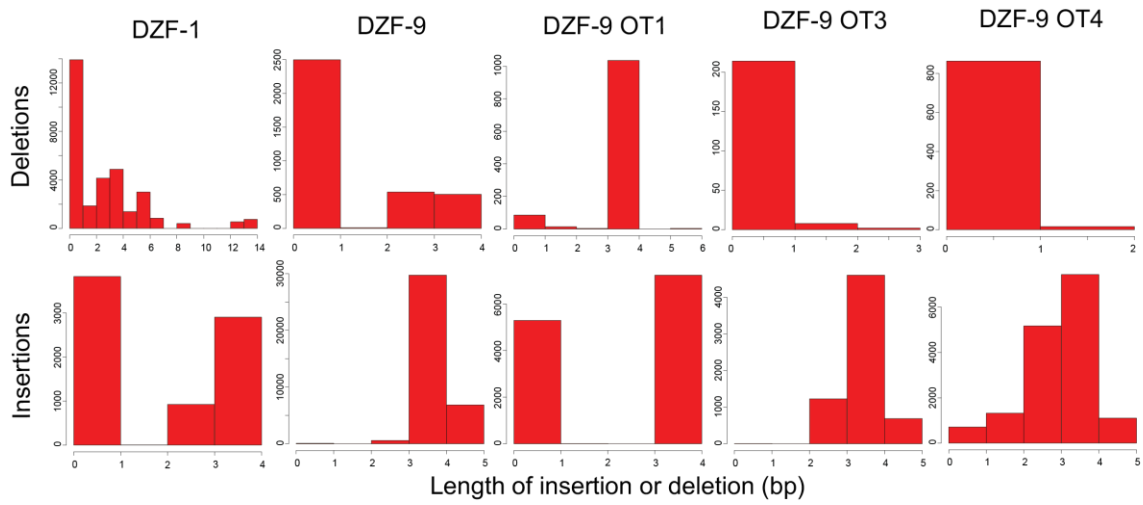

**Supplementary Figure 2.** Distribution of indel size in DMD myoblasts treated with DZF-1 or DZF-9 as determined by deep sequencing.

| Primer name       | Primer sequence                                                                          | Notes                                               |
|-------------------|------------------------------------------------------------------------------------------|-----------------------------------------------------|
| CelI-DZF-1/3/10-F | GAGTTTGGCTCAAATGTTACTCTT                                                                 | Forward Surveyor primer for DZF-1, DZF-3 and DZF-10 |
| CelI-DZF-1/3/10-R | GGGAAATGGTCTAGGAGAGTAAAGT                                                                | Reverse Surveyor primer for DZF-1, DZF-3 and DZF-10 |
| CelI-DZF-5-F      | CCTCAGTGTAAATCCATTTGGTAAAA                                                               | Forward Surveyor primer for DZF-5                   |
| CelI-DZF-6-F      | CAAAGTTGTGCTGAAGGTATTTAGG                                                                | Forward Surveyor primer for DZF-6                   |
| CelI-DZF-5/6-R    | CTGCTACTTACTGGGAATTTGACAT                                                                | Reverse Surveyor primer for DZF-5 and DZF-6         |
| CelI-DZF-7-F      | AACCATTGGAATTTACAGGATGAT                                                                 | Forward Surveyor primer for DZF-7                   |
| CelI-DZF-7-R      | GGCTGAGTTAAATGGTATTTCTGG                                                                 | Reverse Surveyor primer for DZF-7                   |
| CelI-DZF-8-F      | ACTTGCACCTCATTCTAATTGTGA                                                                 | Forward Surveyor primer for DZF-8                   |
| CelI-DZF-8-R      | CCTCCTACCTGAATGTTAGAGACAA                                                                | Reverse Surveyor primer for DZF-8                   |
| CelI-DZF-9-F      | GATGCAAGAGATAGAGCAGTGAGA                                                                 | Forward Surveyor primer for DZF-9                   |
| CelI-DZF-9-R      | GTTTGGAAAAAGACAGAAAGGAAG                                                                 | Reverse Surveyor primer for DZF-9                   |
| CelI-DZF-11-F     | CCAATGACTTAAGGTTTCTTCACA                                                                 | Forward Surveyor primer for DZF-11                  |
| CelI-DZF-11-R     | CTGAATCATGTGATGAAAAAGACCA                                                                | Reverse Surveyor primer for DZF-11                  |
| CelI-DZF-12/13-F  | CCAACATGAGACTTCTTTTTGTTT                                                                 | Forward Surveyor primer for DZF-12 and DZF-13       |
| CelI-DZF-12/13-R  | AGCTGGAATATGCTTTTACTTTCC                                                                 | Reverse Surveyor primer for DZF-12 and DZF-13       |
| Dys-E44-F         | TGGCGCGTTTTCATTAT                                                                        | Forward RT-PCR primer binding in exon 44            |
| Dys-E52-R         | TTCGATCCGTAATGATTGTTCTAGCC                                                               | Reverse RT-PCR primer binding in exon 52            |
| SSA-fwd           | CTAGCAAAAATAGGCTGTCCC                                                                    | Forward primer to construct SSA luciferase          |
| SSA-luc-DZF-1-rev | GAGGAGGAATTCAGCAGGTACCTCCAACATCAAGGA<br>AGATGGCATTTCTAGTTTGGTCACATAGGACCTCTC<br>ACACACAG | Reverse primer to construct SSA luciferase          |
| SSA-luc-DZF-2-rev | GAGGAGGAATCCAACCTTTTATCATTTTTTCTCATA<br>CCTTCTGCTTGATGATCATCTCACATAGGACCTCTC<br>ACACACAG | Reverse primer to construct SSA luciferase          |
| SSA-luc-DZF-3-rev | GAGGAGGAATTCAGTTTCTTAGTAACACAGGTT<br>GTGTACCAGAGTAACAGTCTTCACATAGGACCTCT<br>CACACACAG    | Reverse primer to construct SSA luciferase          |
| SSA-luc-DZF-4-rev | GAGGAGGAATCAAGCCTTCTCAGTAACAATCATAT<br>ACATGTGGAAGTGGTAAAGATCACATAGGACCTCT<br>CACACACAG  | Reverse primer to construct SSA luciferase          |
| SSA-luc-DZF-5-rev | GAGGAGGAATTCATACATCCATATCCATAACTATAT<br>TGTGAATGTGAATGTGTTACATAGGACCTCTCACA<br>CACAG     | Reverse primer to construct SSA luciferase          |
| SSA-luc-DZF-6-rev | GAGGAGGAATTCATCAAATTTACTTTTATTCCTATGG<br>AATTGGTGAAGTTTTACATAGGACCTCTCACACAC<br>AG       | Reverse primer to construct SSA luciferase          |
| DZF1-OT-1-F       | CATGCTAGCTCCTACAAAGCACTG                                                                 | Forward Surveyor primer for DZF-1 off-target site 1 |
| DZF1-OT-1-R       | GGGAAATGGTACTGAAGAAGACG                                                                  | Reverse Surveyor primer for DZF-1 off-target site 1 |
| DZF1-OT-2-F       | CTGTGCTGCCTATTGCTTTCTGTC                                                                 | Forward Surveyor primer for DZF-1 off-target site 2 |
| DZF1-OT-2-R       | CTGGTTGTGTGCCTAGTGATGG                                                                   | Reverse Surveyor primer for DZF-1 off-target site 2 |
| DZF1-OT-3-F       | CCCATTACTGCATTTGCGGTCTTG                                                                 | Forward Surveyor primer for DZF-1 off-target site 3 |
| DZF1-OT-3-R       | TCAACCTTGCTGCACGGAG                                                                      | Reverse Surveyor primer for DZF-1 off-target site 3 |



|                  |                                                                 |                                                     |
|------------------|-----------------------------------------------------------------|-----------------------------------------------------|
| DZF1-OT-4-F      | CCTCTTCTCTGGGATCTGTGAGT                                         | Forward Surveyor primer for DZF-1 off-target site 4 |
| DZF1-OT-4-R      | GAGAACCCAATGTAATGTGTCTACTGAGC                                   | Reverse Surveyor primer for DZF-1 off-target site 4 |
| DZF1-OT-5-F      | AAAGACACCTTTTCTGCCCTCACG                                        | Forward Surveyor primer for DZF-1 off-target site 5 |
| DZF1-OT-5-R      | GTGCCAGCCCAATTCTTTCTTGTGC                                       | Reverse Surveyor primer for DZF-1 off-target site 5 |
| DZF1-OT-6-F      | GGTCTGGTCCAAGCAATTCTG                                           | Forward Surveyor primer for DZF-1 off-target site 6 |
| DZF1-OT-6-R      | CGCCCGCCAGATTTGTCTA                                             | Reverse Surveyor primer for DZF-1 off-target site 6 |
| DZF1-OT-7-F      | CCACACACACAGGACACTGATC                                          | Forward Surveyor primer for DZF-1 off-target site 7 |
| DZF1-OT-7-R      | CCAGAAGGCAGCCACTAGAAAC                                          | Reverse Surveyor primer for DZF-1 off-target site 7 |
| DZF1-OT-8-F      | CTAGAATTACAGGCGTGAGCCACT                                        | Forward Surveyor primer for DZF-1 off-target site 8 |
| DZF1-OT-8-R      | GCAGCTGAGTTGCAGGCATAAG                                          | Reverse Surveyor primer for DZF-1 off-target site 8 |
| DZF9-OT-1-F      | ACGTTCTGGGAAACACAGGG                                            | Forward Surveyor primer for DZF-9 off-target site 1 |
| DZF9-OT-1-R      | CCACCAAAGGCAGTCCATAAAC                                          | Reverse Surveyor primer for DZF-9 off-target site 1 |
| DZF9-OT-2-F      | GCACAGGGTACACCCCATTAAC                                          | Forward Surveyor primer for DZF-9 off-target site 2 |
| DZF9-OT-2-R      | AGTCTCTCCATCCCCGAGGT                                            | Reverse Surveyor primer for DZF-9 off-target site 2 |
| DZF9-OT-3-F      | CTGGTTTCTGCACCACATATTGCC                                        | Forward Surveyor primer for DZF-9 off-target site 3 |
| DZF9-OT-3-R      | CACATGGCCCGCAGGAGAAA                                            | Reverse Surveyor primer for DZF-9 off-target site 3 |
| DZF9-OT-4-F      | AAAAGGGAGCAGGTGAGCACAC                                          | Forward Surveyor primer for DZF-9 off-target site 4 |
| DZF9-OT-4-R      | GGGGGAATTTGGGGAAACTTTCCT                                        | Reverse Surveyor primer for DZF-9 off-target site 4 |
| DZF9-OT-5-F      | TGAGTCAGATGGCCAGGGA                                             | Forward Surveyor primer for DZF-9 off-target site 5 |
| DZF9-OT-5-R      | CTTGAGCCTCCACAGGTGA                                             | Reverse Surveyor primer for DZF-9 off-target site 5 |
| DZF9-OT-6-F      | TGGACTGAGGGAACCCCTCT                                            | Forward Surveyor primer for DZF-9 off-target site 6 |
| DZF9-OT-6-R      | CAGATTTCCAGGGAAGCTCG                                            | Reverse Surveyor primer for DZF-9 off-target site 6 |
| DZF9-OT-7-F      | GCGCGCTCGGGTGAAAAATTAAG                                         | Forward Surveyor primer for DZF-9 off-target site 7 |
| DZF9-OT-7-R      | TCCCCTTCTCCACCTCCAG                                             | Reverse Surveyor primer for DZF-9 off-target site 7 |
| DZF9-OT-8-F      | GGCTCCCCTCTTGTAAATGTTG                                          | Forward Surveyor primer for DZF-9 off-target site 8 |
| DZF9-OT-8-R      | AGTGAGGACGATGACCAGCG                                            | Reverse Surveyor primer for DZF-9 off-target site 8 |
| DZF1-ON-miseq-R  | GTCTCGTGGGCTCGGAGATGTGTATAAGAGACAGag<br>agaaagccagtcggttaagtctt | Deep seq primers                                    |
| DZF1-OT1-miseq-F | TCGTGGCAGCGTCAGATGTGTATAAGAGACAGTAG<br>GAAACAAGGAACAGGCTTCTA    | Deep seq primers                                    |
| DZF1-OT1-miseq-R | GTCTCGTGGGCTCGGAGATGTGTATAAGAGACAGTT<br>TATGGATTGGCTGTATTAAGCA  | Deep seq primers                                    |
| DZF1-OT2-miseq-F | TCGTGGCAGCGTCAGATGTGTATAAGAGACAGCTT<br>TTTCCGAAATTTTACCTTT      | Deep seq primers                                    |
| DZF1-OT2-miseq-R | GTCTCGTGGGCTCGGAGATGTGTATAAGAGACAGTG<br>AACTCATGTTGCTTGATTTT    | Deep seq primers                                    |
| DZF1-OT3-miseq-F | TCGTGGCAGCGTCAGATGTGTATAAGAGACAGtg<br>tggttcttttaggattaag       | Deep seq primers                                    |
| DZF1-OT3-miseq-R | GTCTCGTGGGCTCGGAGATGTGTATAAGAGACAGag<br>aagggaagacgatgaaataaca  | Deep seq primers                                    |
| DZF1-OT4-miseq-F | TCGTGGCAGCGTCAGATGTGTATAAGAGACAGgtc<br>acagaatcctaggcttgaca     | Deep seq primers                                    |
| DZF1-OT4-miseq-R | GTCTCGTGGGCTCGGAGATGTGTATAAGAGACAGat                            | Deep seq primers                                    |

|                     |                                                                   |                                       |
|---------------------|-------------------------------------------------------------------|---------------------------------------|
|                     | catttgatttcttttgtctcttcc                                          |                                       |
| DZF1-OT5-miseq-F    | TCGTCGGCAGCGTCAGATGTGTATAAGAGACAGAAA<br>CCAAATCAACAAACAGATGAA     | Deep seq primers                      |
| DZF1-OT5-miseq-R    | GTCTCGTGGGCTCGGAGATGTGTATAAGAGACAGTT<br>TTCAAAGGGAAAGTAAACCTTG    | Deep seq primers                      |
| DZF1-OT6-miseq-F    | TCGTCGGCAGCGTCAGATGTGTATAAGAGACAGCAC<br>TCCATGGTTCTTATGTCAGAG     | Deep seq primers                      |
| DZF1-OT6-miseq-R    | GTCTCGTGGGCTCGGAGATGTGTATAAGAGACAGAC<br>TCTTCCTTGTCACAGTAATGTC    | Deep seq primers                      |
| DZF1-OT7-miseq-F    | TCGTCGGCAGCGTCAGATGTGTATAAGAGACAGCAC<br>TATCAAAGCCAAAAAGAAACA     | Deep seq primers                      |
| DZF1-OT7-miseq-R    | GTCTCGTGGGCTCGGAGATGTGTATAAGAGACAGTT<br>GTCAGGTTTGCCCTTATTGAGTA   | Deep seq primers                      |
| DZF1-OT8-miseq-F    | TCGTCGGCAGCGTCAGATGTGTATAAGAGACAGatt<br>taccaagtgcattcatctttt     | Deep seq primers                      |
| DZF1-OT8-miseq-R    | GTCTCGTGGGCTCGGAGATGTGTATAAGAGACAGct<br>tttagaggggatttttcttctgctg | Deep seq primers                      |
| DZF9-ON-miseq-F     | TCGTCGGCAGCGTCAGATGTGTATAAGAGACAGCAG<br>ATAGATGTTCTTCAGGTGGTG     | Deep seq primers                      |
| DZF9-ON-miseq-R     | GTCTCGTGGGCTCGGAGATGTGTATAAGAGACAGCT<br>GAAGCATATTCAGAGGATGATG    | Deep seq primers                      |
| DZF9-OT1-miseq-F    | TCGTCGGCAGCGTCAGATGTGTATAAGAGACAGATA<br>ACTGGAGTAGCCACAGTAGCA     | Deep seq primers                      |
| DZF9-OT1-miseq-R    | GTCTCGTGGGCTCGGAGATGTGTATAAGAGACAGTA<br>AAGTATCGCATCAGGCTACAAA    | Deep seq primers                      |
| DZF9-OT2-miseq-F    | TCGTCGGCAGCGTCAGATGTGTATAAGAGACAGTCT<br>TTAGTAGAGACGGGGTTTTCAC    | Deep seq primers                      |
| DZF9-OT2-miseq-R    | GTCTCGTGGGCTCGGAGATGTGTATAAGAGACAGAC<br>TGGTCTCGTGATCTGCCTAC      | Deep seq primers                      |
| DZF9-OT3-miseq-F    | TCGTCGGCAGCGTCAGATGTGTATAAGAGACAGTAA<br>ATAGGCTTTGCAGTACCTTCC     | Deep seq primers                      |
| DZF9-OT3-miseq-R    | GTCTCGTGGGCTCGGAGATGTGTATAAGAGACAGTT<br>TTCACTGCTGACAGTTTTATCC    | Deep seq primers                      |
| DZF9-OT4-miseq-F    | TCGTCGGCAGCGTCAGATGTGTATAAGAGACAGctg<br>ctatcgtccctacctcctt       | Deep seq primers                      |
| DZF9-OT4-miseq-R    | GTCTCGTGGGCTCGGAGATGTGTATAAGAGACAGgg<br>agagtagcagtgccctggac      | Deep seq primers                      |
| DZF9-OT5-miseq-F    | TCGTCGGCAGCGTCAGATGTGTATAAGAGACAGTAC<br>TTAAGCCCTGTGCCTCAGTTT     | Deep seq primers                      |
| DZF9-OT5-miseq-R    | GTCTCGTGGGCTCGGAGATGTGTATAAGAGACAGAG<br>CCAGAAACGATACTTCAGGTT     | Deep seq primers                      |
| DZF9-OT6-miseq-F    | TCGTCGGCAGCGTCAGATGTGTATAAGAGACAGatc<br>ctaggacttccctgacagc       | Deep seq primers                      |
| DZF9-OT6-miseq-R    | GTCTCGTGGGCTCGGAGATGTGTATAAGAGACAGct<br>acaaggaggagggtccttattc    | Deep seq primers                      |
| DZF9-OT7-miseq-F    | TCGTCGGCAGCGTCAGATGTGTATAAGAGACAGcca<br>agccggagcctcctctg         | Deep seq primers                      |
| DZF9-OT7-miseq-R    | GTCTCGTGGGCTCGGAGATGTGTATAAGAGACAGgt<br>gacctgtgaatcggtttatct     | Deep seq primers                      |
| DZF9-OT8-miseq-F    | TCGTCGGCAGCGTCAGATGTGTATAAGAGACAGaag<br>tgctacaaagagctccactg      | Deep seq primers                      |
| DZF9-OT8-miseq-R    | GTCTCGTGGGCTCGGAGATGTGTATAAGAGACAGca<br>cctctgacaatatgaggatttg    | Deep seq primers                      |
| Universal i5 primer | AATGATACGGCGACCACCGAGATCTACACTCGTCGG<br>CAGCGTC                   | Universal primer for deep seq library |
| BC1                 | CAAGCAGAAGACGGCATAACGAGATACATCGGTCTCG<br>TGGGCTCGG                | Barcode primer                        |
| BC2                 | CAAGCAGAAGACGGCATAACGAGATTGGTCAGTCTCG<br>TGGGCTCGG                | Barcode primer                        |
| BC3                 | CAAGCAGAAGACGGCATAACGAGATCACTGTGTCTCG<br>TGGGCTCGG                | Barcode primer                        |
| BC4                 | CAAGCAGAAGACGGCATAACGAGATATTGGGCTCTCG<br>TGGGCTCGG                | Barcode primer                        |

**Supplementary Table 5: Primers used in this study**

**Supplementary sequences for ZFNs used in this study:**

**DZF-1 left ZFN**

ATGGACTACAAAGACCATGACGGTGATTATAAAGATCATGACATCGATTACAAGGATGACGATGACAAGATGGCCCCCAA  
GAAGAAGAGGAAGGTGGGCCGCCCTCGAGCCCGGGGAAAAGCCATATAAATGCCCGAGTGCGGCAAAATCATTAGCAGAA  
AGGACGCCCTGAGAGGCCACCAGCGCACCCATACCGGGGAGAAAACCTTACAAGTGCCCCGAGTGCGGCAAGAGTTTCAGC  
CACAGGACCACCTGACAAACCACAGAGGACCCACACCGGGGAAAAGCCATATAAATGCCCGAGTGCGGCAAAATCATT  
CAGCCAGAGAAAACGCCCTGGCCGGCCACCAGCGCACCCATACCGGGGAAAACCTTATAAGTGTCCCGAGTGCGGCAAGA  
GTTTCAGTACAAAAACGCACTTCAGAAATCATCAGAGGACACATACCGGGGAAAACCGTACAAGTGTCTGAGTGCGGG  
AAGAGTTTCTCCGATCCGGGCCACTTAGTAAGACATCAGAGGACACATACCGGGGAGAAAGCCCTATAAATGTCCAGAATG  
TGAAAAGTCTTTAGCACGTGAGGAACTTAGTAAGACACCAGCGAACTCATACCGGTGCGGCGCCCGCCGCTGGTGA  
AGAGCGAGCTGGAGGAGAAGAAGTCCGAGCTGCGGCACAAGTGAAGTACGTGCCCCACGAGTACATCGAGCTGATCGAG  
ATCGCCAGGAACCCACCCAGGACCGCATCTGGAGATGAAGGTGATGGAGTTCTTCATGAAGGTGTACGGCTACAGGGG  
AGAGCACCTGGGCGGAAGCAGAAAACCTGACGGCGCCATCTATACAGTGGGCAGCCCCATCGATTACGGCGTGATCGTGG  
ACACAAAGGCCCTACAGCGGCGGTACAATCTGCCTATCGGCCAGGCCGACGAGATGGAGAGATACGTGGAGGAGAACCAG  
ACACGGGATAAGCACCTCAACCCCAACGAGTGGTGAAGGTGTACCCTAGCAGCGTGACCGAGTTCAAGTTCCTGTTTCGT  
GAGCGGCCACTTCAAGGCAACTACAAGGCCAGCTGACCAGGCTGAACCACATCACCACACTGCAATGGCGCCGTGCTGA  
GCGTGGAGGAGCTGCTGATCGGCGCGAGATGATCAAAGCCGGCACCTGACACTGGAGGAGGTGCGGCGCAAGTTC AAC  
ACGGCGAGATCAACTTCTGA

**DZF-1 right ZFN**

ATGGACTACAAAGACCATGACGGTGATTATAAAGATCATGACATCGATTACAAGGATGACGATGACAAGATGGCCCCCAA  
GAAGAAGAGGAAGGTGGGCCGCCCTCGAGCCCGGGGAAAAGCCATATAAATGCCCGAGTGCGGCAAAATCATTAGCCAGC  
AGAGAAGCCTGGTGGGCCACCAGCGCACCCATACCGGGGAAAAGCCGTACAATGTCCAGAGTGTGGAAAATCCTTTTCT  
GATAAAAAGGACCTGACACGGCATCAGCGAACCCACACCGGGGAAAAGCCCTACAAGTGCCCCGGAATGCGGCAAGTCTTT  
TAGCACAGCGGACATTTAGTAAGACACCAGAGAACCCACACCGGGGAGAAAACCTTATAAATGCCGAGAATGCGGGAAT  
CGTTCAGTCAAAGACCACTTTAGAAAGACATCAACGGACCCACACCGGGGAAAAGCCCTACAAGTGTCTGAGTGCGGGA  
AAGTCTTTCTCCACTAGCGTTTATTAGTAAGACACCAGAGGACACACACCGGGGAGAAAGCCCTATAAATGTCCAGAATG  
TGAAAAGTCTTTAGCACGTGAGGAACTTAGTAAGACACCAGCGAACTCATACCGGTGCGGCGCCCGCCGCTGGTGA  
AGAGCGAGCTGGAGGAGAAGAAGTCCGAGCTGCGGCACAAGTGAAGTACGTGCCCCACGAGTACATCGAGCTGATCGAG  
ATCGCCAGGAACCCACCCAGGACCGCATCTGGAGATGAAGGTGATGGAGTTCTTCATGAAGGTGTACGGCTACAGGGG  
AGAGCACCTGGGCGGAAGCAGAAAACCTGACGGCGCCATCTATACAGTGGGCAGCCCCATCGATTACGGCGTGATCGTGG  
ACACAAAGGCCCTACAGCGGCGGTACAATCTGCCTATCGGCCAGGCCGACGAGATGCAGAGATACGTGAAGGAGAACCAG  
ACCCGGAATAAGCACATCAACCCCAACGAGTGGTGAAGGTGTACCCTAGCAGCGTGACCGAGTTCAAGTTCCTGTTTCGT  
GAGCGGCCACTTCAAGGCAACTACAAGGCCAGCTGACCAGGCTGAACCGAAAACCAACTGCAATGGCGCCGTGCTGA  
GCGTGGAGGAGCTGCTGATCGGCGCGAGATGATCAAAGCCGGCACCTGACACTGGAGGAGGTGCGGCGCAAGTTC AAC  
ACGGCGAGATCAACTTCTGA

**DZF-2 left ZFN**

ATGGACTACAAAGACCATGACGGTGATTATAAAGATCATGACATCGATTACAAGGATGACGATGACAAGATGGCCCCCAA  
GAAGAAGAGGAAGGTGGGCCGCCCTCGAGCCCGGGGAGAAAGCCCTATAAATGCCCTGAATGTGGCAAGAGCTTCAGTACTA  
GCGGGAATCTCACTGAACATCAGCGAACTCATACCGGGGAGAAAGCCCTATAAATGTCCAGAATGTGGAAAGTCTTTAGC  
ACGTGAGGAACTTAGTAAGACACCAGCGAACTCATACCGGGGAGAAAGCCCTATAAATGTCCAGAATGTGGAAAGTCTTT  
TAGCACGTGAGGAACTTAGTAAGACACCAGCGAACTCATACCGGGGAAAAGCCCTATAAAGTGTCCCGAATGCGGCAAGA  
GTTTACTACTGCGCACTCACAGAACACCAGCGCACTCACACCGGGGAAAAGCCCTATAAAGTGTCCCGAATGCGGCAAGA  
AAGAGCTTCTCAAGGAATGATGCATTTACCGAGCATCAAAGGACTCATACCGGGGAAAAGCCCTATAAAGTGTCCCGAATG  
CGGCAAGAGTCTTTAGTACTGATGCGCACTCACAGAACACCAGCGCACTCACACCGGTGCGGCGCCCGCCGCTGGTGA  
AGAGCGAGCTGGAGGAGAAGAAGTCCGAGCTGCGGCACAAGTGAAGTACGTGCCCCACGAGTACATCGAGCTGATCGAG  
ATCGCCAGGAACCCACCCAGGACCGCATCTGGAGATGAAGGTGATGGAGTTCTTCATGAAGGTGTACGGCTACAGGGG  
AGAGCACCTGGGCGGAAGCAGAAAACCTGACGGCGCCATCTATACAGTGGGCAGCCCCATCGATTACGGCGTGATCGTGG  
ACACAAAGGCCCTACAGCGGCGGTACAATCTGCCTATCGGCCAGGCCGACGAGATGGAGAGATACGTGGAGGAGAACCAG  
ACACGGGATAAGCACCTCAACCCCAACGAGTGGTGAAGGTGTACCCTAGCAGCGTGACCGAGTTCAAGTTCCTGTTTCGT  
GAGCGGCCACTTCAAGGCAACTACAAGGCCAGCTGACCAGGCTGAACCACATCACCACACTGCAATGGCGCCGTGCTGA  
GCGTGGAGGAGCTGCTGATCGGCGCGAGATGATCAAAGCCGGCACCTGACACTGGAGGAGGTGCGGCGCAAGTTC AAC  
ACGGCGAGATCAACTTCTGA

**DZF-2 right ZFN**

ATGGACTACAAAGACCATGACGGTGATTATAAAGATCATGACATCGATTACAAGGATGACGATGACAAGATGGCCCCCAA  
GAAGAAGAGGAAGGTGGGCCGCCCTCGAGCCCGGGGAAAAGCCCTACAAGTGTCTGAGTGCGGAAAAGTCTTTTCTCCACTA  
GCGGTTTATTAGTAAGACACCAGAGGACACACACCGGGGAGAAAGCCATACAATGCCCTGAGTGTGGAAAGTCAATTTAGC  
CAGCGAGTAACTGCGGGCCACCAGCGGACCCACACCGGGGAGAAAACCTTATAAAGTGTCTGAGTGCGGCAAAAGTCT  
CTCTCAAAGTCTCTTATTGCCCATCAAAGGACCCATACCGGGGAGAAAGCCCTATAAATGTCCCGAGTGCGGAAAGT  
CCTTCTCACGGCGCGTGAATTAAGCTCCATCAGAGAACACACACCGGGGAGAAAGCCATACAATGCCCTGAGTGTGGGA  
AAGTCAATTTAGCCAGCGTAATCTGCGGGCCACCAGCGGACCCACACCGGGGAAAAGCCATATAAATGCCCGAGTG  
CGGCAAAATCATTAGCCAAAGTAGCACTTAGTAAGACACCAGCGCACCCATACCGGTGCGGCGCCCGCCGCTGGTGA  
AGAGCGAGCTGGAGGAGAAGAAGTCCGAGCTGCGGCACAAGTGAAGTACGTGCCCCACGAGTACATCGAGCTGATCGAG

ATCGCCAGGAACCCACCCAGGACCGCATCTCTGGAGATGAAGGTGATGGAGTTCCTTCATGAAGGTGTACGGCTACAGGGG  
AGAGCACCTGGGCGGAAGCAGAAAGCCTGACGGCGCCATCTATACAGTGGGCGAGCCCATCGATTACGGCGTGATCGTGG  
ACACAAGGCTACAGCGGCGGTACAATCTGCCTATCGGCCAGGCCAGCAGATGCAGAGATACGTGAAGGAGAACCAG  
ACCCGAAATAAGCACATCAACCCCAACAGAGTGGTGAAGGTGTACCCTAGCAGCGTGACCGAGTTCAAGTTCCTGTTCTG  
GAGCGGCCACTTCAAGGCACTACAAGGCCAGCTGACCAGGCTGAACCGCAAACCACTGCAATGGCGCGGTGCTGA  
GCGTGGAGGAGTGTGATCGGCGGCGAGATGATCAAAGCCGGCACCTGACACTGGAGGAGGTGCGGCGCAAGTTCAA  
AACGGCGAGATCAACTTCTGA

**DZF-3 left ZFN**

ATGGACTACAAAGACCATGACGGTGATTATAAAGATCATGACATCGATTACAAGGATGACGATGACAAGATGGCCCCAA  
GAAGAAGAGGAAGTGGGCCCGCTCGAGCCCGGGGAGAAACCATACAATGCCCGAGTGTGAAAGTCATTTAGTGATC  
CAGGCGCATTAGTAAGACATCAGCGGACACATACCGGGGAAAAGCCCTATAAATGTCCCGAGTGGGAAAAGTCTTTTCC  
AGCCCTGCGGACCTGACACGCCACCAAGAACGCACACCGGGGAAAACCTTACAAGTGCCCTGAGTGCGGCAAGAGCTT  
CTCTCAATCAAGTTCATTAGTAAGACACCAGAGGACTCATACCGGGGAAAAGCCCTATAAAGTGGCCAGAGTGGCGGAAAT  
CATTTCTACAGCTGGCACATCTTAGAGCCACCAGCGGACCCACACCGGGGAAAAGCCGTACAATGTCCAGAGTGTGGA  
AAATCCTTTTCTGATAAAAAGGACCTGACACGGCATCAGCGAACCCACACCGGGGAGAAAACCATACAATGCCCGAGTG  
TGGAAAGTCATTTAGTGATCCAGGCGCATTAGTAAGACATCAGCGGACACATACCGTCCCGGTGCGGCCCGCCGCGCC  
TGGTGAAGAGCGAGCTGGAGGAGAAGAAGTCCGAGCTGCGGCACAAGCTGAAGTACGTGCCCCACGAGTACATCGAGCTG  
ATCGAGATCGCCAGGAACCCACCCAGGACCGCATCTGGAGATGAAGGTGATGGAGTTCCTCATGAAGGTGTACGGCTA  
CAGGGGAGAGCACCTGGGCGGAAGCAGAAAGCCTGACGGCGCCATCTATACAGTGGGCGAGCCCATCGATTACGGCGTGA  
TCGTGGACACAAAGGCCTACAGCGGCGGTACAATCTGCCTATCGGCCAGGCCGACGAGATGGAGAGATACGTGGAGGAG  
AACCCAGACACGGGATAAGCACCTCAACCCCAACGAGTGGTGAAGGTGTACCCTAGCAGCGTGACCGAGTTCAGATTCTCT  
GTTCTGAGCGGCGCACTTCAAGGGCACTACAAGGCCAGCTGACCAGGCTGAACCCATACCAACTGCAATGGCGCGG  
TGCTGAGCGTGGAGGAGCTGCTGATCGGCGGCGAGATGATCAAAGCCGGCACCTGACACTGGAGGAGGTGCGGCGCAAG  
TTACAACCGGCGAGATCAACTTCTGA

**DZF-3 right ZFN**

ATGGACTACAAAGACCATGACGGTGATTATAAAGATCATGACATCGATTACAAGGATGACGATGACAAGATGGCCCCAA  
GAAGAAGAGGAAGTGGGCCCGCTCGAGCCCGGGGAAAACCATACAAGTGCCTCGAGTGTGGAAGAGCTTTAGTACCC  
ACCTCGACCTGATTAGACACCAGCGCACCCACACCGGGGAAAAGCCATATAAATGCCCGAGTGGGCAAATCATTCAGC  
CAAAGTAGCAACTTAGTAAGACACCAGCGCACCCATACCGGGGAAAAGCCATATAAGTGCCTGAGTGTGGAAGAGCTT  
CAGTAGGAAGGATAACCTTAAAAACCACAAAGAACCCACACCGGGGAAAACCCATACAAGTGCCTCGAGTGTGGAAGG  
GCTTTAGTACCCACCTCGACCTGATTAGACACCAGCGCACCCACACCGGGGAAAAGCCCTACAAGTGTCTGAGTGGGGA  
AAGTCTTTCTCCACTAGCGGTTTATTAGTAAGACACCAGAGGACACACACCGGGGAGAAGCCGTACAAGTGCCTGAAAT  
TGGTAAGTCAATTTTCGAAAGTATGAATTAGTAAGACACCAGCGGACTCATACCGGTCCTCGGTCGCGCCCGCCGCGC  
TGGTGAAGAGCGAGCTGGAGGAGAAGAAGTCCGAGCTGCGGCACAAGCTGAAGTACGTGCCCCACGAGTACATCGAGCTG  
ATCGAGATCGCCAGGAACCCACCCAGGACCGCATCTGGAGATGAAGGTGATGGAGTTCCTCATGAAGGTGTACGGCTA  
CAGGGGAGAGCACCTGGGCGGAAGCAGAAAGCCTGACGGCGCCATCTATACAGTGGGCGAGCCCATCGATTACGGCGTGA  
TCGTGGACACAAAGGCCTACAGCGGCGGTACAATCTGCCTATCGGCCAGGCCGACGAGATGCAGAGATACGTGAAGGAG  
AACCCAGACCCGGAATAAGCACATCAACCCCAACGAGTGGTGAAGGTGTACCCTAGCAGCGTGACCGAGTTCAGATTCTCT  
GTTCTGAGCGGCGCACTTCAAGGGCACTACAAGGCCAGCTGACCAGGCTGAACCGCAAACCACTGCAATGGCGCGG  
TGCTGAGCGTGGAGGAGCTGCTGATCGGCGGCGAGATGATCAAAGCCGGCACCTGACACTGGAGGAGGTGCGGCGCAAG  
TTACAACCGGCGAGATCAACTTCTGA

**DZF-4 left ZFN**

ATGGACTACAAAGACCATGACGGTGATTATAAAGATCATGACATCGATTACAAGGATGACGATGACAAGATGGCCCCAA  
GAAGAAGAGGAAGTGGGCCCGCTCGAGCCCGGGGAAAAGCCATATAAAGTGCCTGAGTGTGGAAGAGCTTCAGTAGGA  
AGGATAACCTTAAAAACCACAAAGAACCCACACCGGGGAAAACCTTACAAGTGCCTGAGTGGGCAAGAGCTTCTCT  
CAATCAAGTTCATTAGTAAGACACCAGAGGACTCATACCGGGGAGAAGCCGTACAAGTGCCTGAAATGTGGTAAATCATT  
TTCGAGAAGTGAATTAGTAAGACACCAGCGGACTCATACCGGGGAAAAGCCATATAAATGCCCGAGTGGCGCAAAT  
CATTCAGCCAAAGTAGCAACTTAGTAAGACACCAGCGCACCCATACCGGGGAGAAGCCGTACAAGTGCCTGAAATGTGGT  
AAGTCAATTTTCGAGAAGTGAATTAGTAAGACACCAGCGGACTCATACCGGGGAAAACCTTATAAGTGTCCCGAGTG  
CGGCAAGAGTTTTCAGTCAAAAACGCACTTCAAGATCATCAGAGGACACATACCGGTCCTCGGTCGCGCCCGCCGCGCC  
TGGTGAAGAGCGAGCTGGAGGAGAAGAAGTCCGAGCTGCGGCACAAGCTGAAGTACGTGCCCCACGAGTACATCGAGCTG  
ATCGAGATCGCCAGGAACCCACCCAGGACCGCATCTGGAGATGAAGGTGATGGAGTTCCTCATGAAGGTGTACGGCTA  
CAGGGGAGAGCACCTGGGCGGAAGCAGAAAGCCTGACGGCGCCATCTATACAGTGGGCGAGCCCATCGATTACGGCGTGA  
TCGTGGACACAAAGGCCTACAGCGGCGGTACAATCTGCCTATCGGCCAGGCCGACGAGATGGAGAGATACGTGGAGGAG  
AACCCAGACACGGGATAAGCACCTCAACCCCAACGAGTGGTGAAGGTGTACCCTAGCAGCGTGACCGAGTTCAGATTCTCT  
GTTCTGAGCGGCGCACTTCAAGGGCACTACAAGGCCAGCTGACCAGGCTGAACCCATACCAACTGCAATGGCGCGG  
TGCTGAGCGTGGAGGAGCTGCTGATCGGCGGCGAGATGATCAAAGCCGGCACCTGACACTGGAGGAGGTGCGGCGCAAG  
TTACAACCGGCGAGATCAACTTCTGA

**DZF-4 right ZFN**

ATGGACTACAAAGACCATGACGGTGATTATAAAGATCATGACATCGATTACAAGGATGACGATGACAAGATGGCCCCAA  
GAAGAAGAGGAAGTGGGCCCGCTCGAGCCCGGGGAGAAACCATACAAGTGTCCAGAGTGGGGAAAAGCTTTAGTACAA  
GCGGTGAGTGTAGTAAGACCAACGAACACACACCGGGGAAAAGCCATATAAAGTGCCTGAGTGTGGAAGAGCTTCAGT

AGGAAGGATAACCTTAAAAACCACAAAGAACCACACCGGGGAGAAGCCATATAAATGTCCCAGTGTGGCAAGTCCTT  
TTCTAGATCAGATAATTTAGTAAGACATCAGAGAACGCACACCGGGGAAAAACCATACAAGTGCCCCGAGTGTGGCAAGA  
GCTTTTAGTACCACCTCGACCTGATTAGACACCAGCGCACCCACACCGGGGAAAAGCCCTACAAGTGCTTGTAGTGGGA  
AAGTCTTTTCTCCACTAGCGTTTATTAGTAAGACACCAGAGGACACACACCGGGGAAAAACCCTATAAGTGTCCCAGTGT  
CGGAAGAGTTTCAAGTCAAAAACGCCTTCAAGATCATCAGAGGACACATACCGGTCCCAGTGTGGCCGCGCCGCGCC  
TGGTGAAGAGCGAGCTGGAGGAGAAGAAGTCCGAGCTGCGGCACAAGCTGAAGTACGTGCCCCACGAGTACATCGAGCTG  
ATCGAGATCGCCAGGAACCCACCCAGGACCGCATCTGGAGATGAAGGTGATGGAGTTCTTCATGAAGGTGTACGGCTA  
CAGGGGAGAGCCTGGGCGGAAGCAGAAAGCCTGACGGCGCCATCTATACAGTGGGCGAGCCCCATCGATTACGGCGTGA  
TCGTGGACACAAAGGCCTACAGCGCGGCTACAATCTGCCTATCGGCCAGGCCGACGAGATGCAGAGATACGTGAAGGAG  
AACCAGACCCGGAAATAAGCACATCAACCCCAACGAGTGGTGAAGGTGTACCTAGCAGCGTGACCGAGTTCAAGTTCTT  
GTTCTGTGAGCGGCCACTCAAGGGCACTACAAGGCCAGCTGACCAGGCTGAACCGCAAACCAACTGCAATGGCGCCG  
TGCTGAGCGTGGAGGAGCTGCTGATCGGCGGAGATGATCAAAGCCGGCACCTTGACACTGGAGGAGGTGCGGCGCAAG  
TTCAACAACGGCGAGATCAACTTCTGA

**DZF-5 left ZFN**

ATGGACTACAAAGACCATGACGGTGATTATAAAGATCATGACATCGATTACAAGGATGACGATGACAAGATGGCCCCAA  
GAAGAAGAGGAAGGTGGGCCGCTCGAGCCCGGGGAGAAGCCATATAAATGTCCCAGTGTGGCAAGTCTTTTCTAGAT  
CAGATAATTTAGTAAGACATCAGAGAACGCACACCGGGGAAAAGCCATATAAATGTCCCAGTGTGGCAAAATCCTTCTCT  
ACCCTGGCAACCTCACAGTGCATCAACGGACTCACACCGGGGAGAAGCCGTACAAGTGCCCTGAATGTGGTAAGTCATT  
TTTCGAGAAGTGAATTTAGTAAGACACCAGCGGACTCATACCGGGGAAAAGCCATATAAATGTCCCAGTGTGGCAAAAT  
CCTTCTCTACCCTGGCAACCTCACAGTGCATCAACGGACTCACACCGGGGAGAAGCCGTACAAGTGCCCTGAATGTGGT  
AAGTCATTTTCGAGAAGTGAATTTAGTAAGACACCAGCGGACTCATACCGGTGCGGCCGCGCCGCGCCTGGTGAAGAG  
CGAGCTGGAGGAGAAGTCCGAGCTGCGGCACAAGTGAAGTACGTGCCCCACGAGTACATCGAGCTGATCGGAGTACG  
CCAGGAACCCCAACCCAGGACCGCATCTGGAGATGAAGGTGATGGAGTTCTTCATGAAGGTGTACGGCTACAGGGGAGAG  
CACCTGGGCGGAAGCAGAAAGCCTGACGGCGCCATCTATACAGTGGGCGAGCCCCATCGATTACGGCGTGTGATCGTGGACAC  
AAAGGCCTACAGCGGCGCTACAATCTGCCTATCGGCCAGGCCGACGAGATGGAGAGATACGTGGAGGAGAACCAGACAC  
GGATAAGCACCTCAACCCCAACGAGTGGTGAAGGTGTACCTAGCAGCGTGACCGAGTTCAAGTTCTTCTGTGAGC  
GGCCACTTCAAGGGCACTACAAGGCCAGCTGACCAGGCTGAACCCACATCAACCAACTGCAATGGCGCCGCTGAGCGT  
GGAGGAGCTGCTGATCGGCGGAGATGATCAAAGCCGGCACCTTGACACTGGAGGAGGTGCGGCGCAAGTTCAACAACG  
CGGAGATCAACTTCTGA

**DZF-5 right ZFN**

ATGGACTACAAAGACCATGACGGTGATTATAAAGATCATGACATCGATTACAAGGATGACGATGACAAGATGGCCCCAA  
GAAGAAGAGGAAGGTGGGCCGCTCGAGCCCGGGGAAAAGCCCTACAAGTGCCCTGAGTGTGGCAAGAGCTTCTCTCAAT  
CAAGTTCTTAGTAAGACACCAGAGGACTCATACCGGGGAGAAGCCCTATAAATGTCCAGAATGTGGAAAGTCTTTTAGC  
ACGTGAGGAACTTAGTAAGACACCAGCGAATCATACCGGGGAGAAGCCCTATAAATGTCCCAGTGTGGAAAGTCTTT  
CTACCGGCGATGAATGAACGTCCATCAGAGAACACACACCGGGGAGAAGCCCTATAAATGTCCAGAATGTGGAAAGT  
CCTTTAGCACGTGAGGAACTTAGTAAGACACCAGCGAATCATACCGGGGAGAAGCCCTATAAATGTCCCAGTGTGGGA  
AAGTCTTCTCACGCGCGGATGAATTTGAACTCCATCAGAGAACACACACCGGGGAAAAGCCCTACAAGTGTCTTGTG  
CGGAAAGTCTTTTCTCCACTAGCGGTTTATTAGTAAGACACCAGAGGACACACACCGGTGCGGCCGCGCCGCGCCTGGTGA  
AGAGCGAGCTGGAGGAGAAGAAGTCCGAGCTGCGGCACAAGTGAAGTACGTGCCCCACGAGTACATCGAGCTGATCGAG  
ATCGCCAGGAACCCCAACCCAGGACCGCATCTGGAGATGAAGGTGATGGAGTTCTTCATGAAGGTGTACGGCTACAGGGG  
AGACACCTGGGCGGAAGCAGAAAGCCTGACGGCGCCATCTATACAGTGGGCGAGCCCCATCGATTACGGCGTGTGATCGTGG  
ACACAAAGGCCCTACAGCGCGGCTACAATCTGCCTATCGGCCAGGCCGACGAGATGCAGAGATACGTGAAGGAGAACCAG  
ACCCGGAATAAGCACATCAACCCCAACGAGTGGTGAAGGTGTACCTAGCAGCGTGACCGAGTTCAAGTTCTTCTGTTCGT  
GAGCGGCCACTTCAAGGGCACTACAAGGCCAGCTGACCAGGCTGAACCGCAAACCAACTGCAATGGCGCCGCTGCTGA  
CCGTGGAGGAGCTGCTGATCGGCGGAGATGATCAAAGCCGGCACCTTGACACTGGAGGAGGTGCGGCGCAAGTTCAAC  
AACGGCGAGATCAACTTCTGA

**DZF-6 left ZFN**

ATGGACTACAAAGACCATGACGGTGATTATAAAGATCATGACATCGATTACAAGGATGACGATGACAAGATGGCCCCAA  
GAAGAAGAGGAAGGTGGGCCGCTCGAGCCCGGGGAAAAGCCCTACAAGTGTCTTGTAGTGTGGAAAGTCTTTTCTCCACTA  
GCGGTTCTTAGTAAGACACCAGAGGACACACACCGGGGAAAAGCCATATAAATGTCCCAGTGTGGCAAAATCATTCAGC  
CAAAGTAGCAACTTAGTAAGACACCAGCGCACCCATACCGGGGAAAAGCCCTACAAGTGCCCGGAATGCGGCAAGTCTTT  
TAGCACAGCGGACATTTAGTAAGACACCAGAGAACCACACACCGGGGAAAAGCCCTATAAAGTGTCCCAGTGTGGCAAGA  
GTTTCAGTCAAAAAACGCCTTCAAGATCATCAGAGGACACATACCGGTGCGGCCGCGCCGCGCCTGGTGAAGAGCGAG  
CTGGAGGAGAAGAAGTCCGAGCTGCGGCACAAGTGAAGTACGTGCCCCACGAGTACATCGAGCTGATCGAGATCGCCAG  
GAACCCCAACCCAGGACCGCATCTGGAGATGAAGGTGATGGAGTTCTTCATGAAGGTGTACGGCTACAGGGGAGAGCACC  
TGGGCGGAAGCAGAAAGCCTGACGGCGCCATCTATACAGTGGGCGAGCCCCATCGATTACGGCGTGTGATCGTGGACACAAG  
GCCATACGCGCGGCTACAATCTGCCTATCGGCCAGGCCGACGAGATGGAGAGATACGTGGAGGAGAACCAGACACGGGA  
TAAGCACCTCAACCCCAACGAGTGGTGAAGGTGTACCTAGCAGCGTGACCGAGTTCAAGTTCTTCTGTGAGCGGCC  
ACTTCAAGGGCACTACAAGGCCAGCTGACCAGGCTGAACCCACATCAACCAACTGCAATGGCGCCGCTGCTGAGCGTGGAG  
GAGCTGCTGATCGGCGGAGATGATCAAAGCCGGCACCTTGACACTGGAGGAGGTGCGGCGCAAGTTCAACAACGGCGA  
GATCAACTTCTGA

**DZF-6 right ZFN**

ATGGACTACAAAGACCATGACGGTGATTATAAAGATCATGACATCGATTACAAGGATGACGATGACAAGATGGCCCCAA  
GAAGAAGAGGAAGGTGGGCCGCTCGAGCCCGGGGAAAGCCATATAAATGCCCGAGTGCGGCAAAATCATTAGCCAGG  
CCGGCCACCTGGCCAGCCACCAGGCACCCATACCGGGGAAAAACCTTATAAGTGTCCGAGTGCGGCAAGAGTTTCAGT  
CACAAAAACGCACTTCAGAATCATCAGAGGACACATACCGGGGAAAAACCTTACAAGTGCCCTGAGTGCGGCAAGAGCTT  
CTCTCAATCAAGTTCATTAGTAAGACACCAGAGGACTCATACCGGGGAGAAGCCATACAATGCCCTGAGTGTGAAAGT  
CATTTAGCCAGCGAGCTAATCTGCGGGCCACCAGCGGACCCACACCGGGGAGAAACCTTATAAGTGTCCCTGAGTGC  
AAAAGTTTCTCTCAAAGTCTCCCTTATTGCCATCAAAGGACCCATACCGGGGAGAAACCTTATAAATGCCCGAGAATG  
CGGAAATCGTTTCAGTCAAAGAGCACATTTAGAAAGACATCAACGGACCCACACCGGTGCGGCGCCCGCGCCCTGGTGA  
AGAGCGAGCTGGAGGAGAAGTCCGAGCTGCGGCACAAGCTGAAGTACGTGCCCCAGGATACATCGAGCTGATCGAG  
ATCGCCAGGAACCCACCAGGACCGCATCTGGAGATGAAGGTGATGGAGTTCTTCATGAAGGTGTACGGCTACAGGGG  
AGAGCACCTGGGCGAAGCAGAAAGCCTGACGGCCCATCTATACAGTGGGACGCCCCATCGATTACGGCGTGATCGTGG  
ACACAAAGGCCCTACAGCGCGGCTACAATCTGCCTATCGGCCAGGCGGACGAGATGCAGAGATACGTGAAGGAGAACCAG  
ACCCGGAATAAGCACATCAACCCCAACGAGTGGTGAAGGTGTACCTAGCAGCGTGACCGAGTTCAAGTTCTGTTCGT  
GAGCGGCCACTTCAAGGCAACTACAAGGCCAGCTGACCAGGCTGAACCGCAAAACCAACTGCAATGGCGCGTGTGTA  
CCGTGGAGGAGCTGCTGATCGGCGGCGAGATGATCAAAGCCGGCACCTGACACTGGAGGAGGTGCGGCGCAAGTTCAAC  
AACGGCGAGATCAACTTCTGA

**DZF-7 left ZFN**

ATGGACTACAAAGACCATGACGGTGATTATAAAGATCATGACATCGATTACAAGGATGACGATGACAAGATGGCCCCAA  
GAAGAAGAGGAAGGTGGGCCGCTCGAGCCCGGGGAAAGCCATTTTCAGTGTAGGATCTGCATGCGAAATTTCTCCATTA  
AGGCCATTTTGACACGCCACACAAGAACCATACAGGGGAGAAACCGTTCCAGTGCAGGATATGCATGCGCAATTTTCAGC  
CGCAGAGAACACCTCGTCCGACACCTCCGGACACACACTGGCGAAAAGCCATTTCAATGCAGGATTTGCATGCGGAAATTT  
CAGCATCAGTCAATAATCTCGCCAGGCATTTGAAAACACACACCGGTCGCGGAGCGGCGCCCGCGCCCTGGTGAAGAGCG  
AGCTGGAGGAGAGAAGTCCGAGCTGCGGCACAAGCTGAAGTACGTGCCCCAGGATACATCGAGCTGATCGAGATCGCC  
AGGAACCCACCAGGACCGCATCTGGAGATGAAGGTGATGGAGTTCTTCATGAAGGTGTACGGCTACAGGGGAGAGCA  
CCTGGGGCGAAGCAGAAAGCCTGACGGCCCATCTATACAGTGGGACGCCCCATCGATTACGGCGTGATCGTGGACACAA  
AGGCCTACAGCGCGGCTACAATCTGCCTATCGGCCAGGCGGACGAGATGCAGAGATACGTGAAGGAGAACCAGACCCGG  
AATAAGCACATCAACCCCAACGAGTGGTGAAGGTGTACCTAGCAGCGTGACCGAGTTCAAGTTCTGTTCGTGAGCGG  
CCACTTCAAGGCAACTACAAGGCCAGCTGACCAGGCTGAACCGCAAAACCAACTGCAATGGCGCCGTGCTGAGCGTGG  
AGGAGCTGCTGATCGGCGGCGAGATGATCAAAGCCGGCACCTGACACTGGAGGAGGTGCGGCGCAAGTTCAACAACGGC  
GAGATCAACTTCTGA

**DZF-7 right ZFN**

ATGGACTACAAAGACCATGACGGTGATTATAAAGATCATGACATCGATTACAAGGATGACGATGACAAGATGGCCCCAA  
GAAGAAGAGGAAGGTGGGCCGCTCGAGCCCGGGGAAAGCCCATTTCCAGTGTAGGATATGCATGAGAAACTTTTCCACCA  
CCACCACCTGGATGCCATACAAGAACTCACACTGGAGAGAAGCCCTTCCAATGCCGATTTGTATGAGGAATTTTAGC  
CAGTCTGCCCATCTCAAAGCCATTTGAGGACCCACAGGGGAGAAACCTTTTCAGTGCCGATTTGCATGAGAAATTT  
TTCCAGGACTGACACCTGGCCCGCATCTGAAGACACATACCGGTCGCGGAGCGGCGCCCGCGCCCTGGTGAAGAGCG  
AGCTGGAGGAGAAGAAGTCCGAGCTGCGGCACAAGCTGAAGTACGTGCCCCAGGATACATCGAGCTGATCGAGATCGCC  
AGGAACCCACCAGGACCGCATCTGGAGATGAAGGTGATGGAGTTCTTCATGAAGGTGTACGGCTACAGGGGAGAGCA  
CCTGGGGCGAAGCAGAAAGCCTGACGGCCCATCTATACAGTGGGACGCCCCATCGATTACGGCGTGATCGTGGACACAA  
AGGCCTACAGCGCGGCTACAATCTGCCTATCGGCCAGGCGGACGAGATGGAGAGATACGTGGAGGAGAACCAGACACGG  
GATAAGCACCTCAACCCCAACGAGTGGTGAAGGTGTACCTAGCAGCGTGACCGAGTTCAAGTTCTGTTCGTGAGCGG  
CCACTTCAAGGGCAACTACAAGGCCAGCTGACCAGGCTGAACCCACATCAACCAACTGCAATGGCGCCGTGCTGAGCGTGG  
AGGAGCTGCTGATCGGCGGCGAGATGATCAAAGCCGGCACCTGACACTGGAGGAGGTGCGGCGCAAGTTCAACAACGGC  
GAGATCAACTTCTGA

**DZF-8 left ZFN**

ATGGACTACAAAGACCATGACGGTGATTATAAAGATCATGACATCGATTACAAGGATGACGATGACAAGATGGCCCCAA  
GAAGAAGAGGAAGGTGGGCCGCTCGAGCCCGGGGAAAGCCCTTCCAGTGTAGGATATGCATGAGAAACTTTTCCACCA  
AACAGCGACTCGTGGTGACACAAGGACACACAGGGGAAAAACCTTTTCAGTGCAGAATTTGTATGCGGAAATTTCTCT  
GTGCGACATAACTTGACCAGGCACCTGCGAACACACACTGGAGAGAACCCTTCCAATGTGCGATCTGCATGCGCAACTT  
TTCTCAGACCCTCACCTTTCTCGCCACTGAAGACGATACCGGTCAGGTGCGGCGCCCGCGCCCTGGTGAAGAGCG  
AGCTGGAGGAGAAGAAGTCCGAGCTGCGGCACAAGCTGAAGTACGTGCCCCAGGATACATCGAGCTGATCGAGATCGCC  
AGGAACCCACCAGGACCGCATCTGGAGATGAAGGTGATGGAGTTCTTCATGAAGGTGTACGGCTACAGGGGAGAGCA  
CCTGGGGCGAAGCAGAAAGCCTGACGGCCCATCTATACAGTGGGACGCCCCATCGATTACGGCGTGATCGTGGACACAA  
AGGCCTACAGCGCGGCTACAATCTGCCTATCGGCCAGGCGGACGAGATGGAGAGATACGTGGAGGAGAACCAGACACGG  
GATAAGCACCTCAACCCCAACGAGTGGTGAAGGTGTACCTAGCAGCGTGACCGAGTTCAAGTTCTGTTCGTGAGCGG  
CCACTTCAAGGGCAACTACAAGGCCAGCTGACCAGGCTGAACCCACATCAACCAACTGCAATGGCGCCGTGCTGAGCGTGG  
AGGAGCTGCTGATCGGCGGCGAGATGATCAAAGCCGGCACCTGACACTGGAGGAGGTGCGGCGCAAGTTCAACAACGGC  
GAGATCAACTTCTGA

**DZF-8 right ZFN**

ATGGACTACAAAGACCATGACGGTGATTATAAAGATCATGACATCGATTACAAGGATGACGATGACAAGATGGCCCCAA  
GAAGAAGAGGAAGGTGGGCCGCTCGAGCCCGGGGAAAGCCATTTCCAGTGCAGGATCTGTATGCGAAACTTTCAGCAACA  
AACAGGCACTCGACCGGCACACCAGGACCCACACAGGAGAAAAACCTTTCAATGTGCAATATGTATGAGGAATTTTCAGC

AGACAGGACAATCTGGGAAGGCACCTTCGCACCTCATACCGGAGAGAAGCCCTTTCAGTGTCCGATTTGCATGCGGAACCT  
CTCACTGAACTCCAACCTGGCCAGACACCTCAAGACTCACACCGGTCAGGAGCGGCCGCCGCCCTGGTGAAGAGCG  
AGCTGGAGGAGAAGAAGTCCGAGCTGCGGCACAAGCTGAAGTACGTGCCCCACGAGTACATCGAGATCGAGATCGCG  
AGGAACCCACCCAGGACCCGATCCTGGAGATGAAGGTGATGGAGTTCTTCATGAAGGTGTACGGCTACAGGGGAGAGCA  
CCTGGGGCGAAGCAGAAAGCCTGACGGGCCATCTATACAGTGGGCAGCCCCATCGATTACGGCGGTGATCGTGGACACAA  
AGGCCTACAGCGCGCGGTACAATCTGCCTATCGGCCAGGCCGACGAGATGCAGAGATACGTGAAGGAGAACCAGACCCGG  
AATAAGCACATCAACCCCAACGAGTGGTGGAAAGGTGTACCCTAGCAGCGTGACCGAGTTCAAGTTCTTCTGTTGAGCGG  
CCACTTCAAGGGCAACTACAAGGCCAGCTGACCAGGCTGAACCGCAAAAACCACTGCAATGGCGCCGTGCTGAGCGTGG  
AGGAGCTGCTGATCGGCGCGGAGATGATCAAAGCCGGCACCTGACACTGGAGGAGGTGCGGCGCAAGTTCAACACACGGC  
GAGATCAACTTCTGA

**DZF-9 left ZFN**

ATGGACTACAAAGACCATGACGGTGATTATAAAGATCATGACATCGATTACAAGGATGACGATGACAAGATGGCCCCAA  
GAAGAAGAGGAAGGTGGGCCGCCCTCGAGCCCGGGGAAAGACCCCTTTCATGCAGAATCTGTATGCGAAACTTTAGTTCTA  
AGCAAGCTCTCGCCGTGCATACCCGCACTCACACTGGTGAAGGCCCTTCCAGTGTAGGATATGCATGCGCAACTTTTCA  
CAGAGTACAACACTGAAGAGACACCTGCGCACCCACACGGGGGAAAAACCCCTTTCAGTGCAGCATTTGTATGCGCAATTT  
CTCCCGATCCGATCATCTCTCACTCCATCTGAAGACACACTTGCAGGGATCCAGCTGGTGAAGAGCGAGCTGGAGGAGA  
AGAAGTCCGAGCTGCGGCACAAGCTGAAGTACGTGCCCCACGAGTACATCGAGCTGATCGAGATCGCCAGGAACCCACC  
CAGGACCCGATCCTGGAGATGAAGGTGATGGAGTTCTTCATGAAGGTGTACGGCTACAGGGGAGAGCACCTGGCGGAAG  
CAGAAAGCCTGACGGCGCCATCTATACAGTGGGCAGCCCCATCGATTACGGCGGTGATCGTGGACACAAAGCCCTACAGCG  
GCGGCTACAATCTGCCTATCGGCCAGGCCGACGAGATGCAGAGATACGTGAAGGAGAACCAGACCCGGAATAAGCACATC  
AACCCCAACGAGTGGTGAAGGTGTACCCTAGCAGCGTGACCAGTTCAAGTTCTTCTGTTGAGCGGCCACTTCAAGGG  
CAACTACAAGGCCAGCTGACCAGGCTGAACCGCAAAAACCACTGCAATGGCGCCGTGCTGAGCGTGGAGGAGCTGCTGA  
TCGGCGCGGAGATGATCAAAGCCGGCACCTGACACTGGAGGAGGTGCGGCGCAAGTTCAACACCGCGGAGATCAACTTC  
TGA

**DZF-9 right ZFN**

ATGGACTACAAAGACCATGACGGTGATTATAAAGATCATGACATCGATTACAAGGATGACGATGACAAGATGGCCCCAA  
GAAGAAGAGGAAGGTGGGCCGCCCTCGAGCCCGGGGAGCGGCCCTTTCATGCAGAATCTGCATGAGGAATTTTCAGTGC  
GGGCCCACTGCAAAATCATACCCGGACCCATACCCGGGAGAAAACCCCTTTCAGTGTCCGATATGTATGAGGAATTTCTCT  
CAGTCCACCACCTGAAAGCGGCACCTTCGCACACACACCCGGGAGAAAGCCATTTCATGTAGAATTTGCATGCGGAACCT  
TTCTGATGGGGTACCTGACACGACACCTGAAGACGATCTGAGGGGATCCAGCTGGTGAAGAGCGAGCTGGAGGAGA  
AGAAGTCCGAGCTGCGGCACAAGCTGAAGTACGTGCCCCACGAGTACATCGAGCTGATCGAGATCGCCAGGAACCCACC  
CAGGACCCGATCCTGGAGATGAAGGTGATGGAGTTCTTCATGAAGGTGTACGGCTACAGGGGAGAGCACCTGGCGGAAG  
CAGAAAGCCTGACGGCGCCATCTATACAGTGGGCAGCCCCATCGATTACGGCGGTGATCGTGGACACAAAGCCCTACAGCG  
GCGGCTACAATCTGCCTATCGGCCAGGCCGACGAGATGGAGAGATACGTGGAGGAGAACCAGACACGGGATAAGCACCTC  
AACCCCAACGAGTGGTGAAGGTGTACCCTAGCAGCGTGACCAGTTCAAGTTCTTCTGTTGAGCGGCCACTTCAAGGG  
CAACTACAAGGCCAGCTGACCAGGCTGAACCCACATCAACCACTGCAATGGCGCCGTGCTGAGCGTGGAGGAGCTGCTGA  
TCGGCGCGGAGATGATCAAAGCCGGCACCTGACACTGGAGGAGGTGCGGCGCAAGTTCAACACCGCGGAGATCAACTTC  
TGA

**DZF-10 left ZFN**

ATGGACTACAAAGACCATGACGGTGATTATAAAGATCATGACATCGATTACAAGGATGACGATGACAAGATGGCCCCAA  
GAAGAAGAGGAAGGTGGGCCGCCCTCGAGCCCGGGGAAACGACCTTTCATGCAGAATCTGTATGAGAAATTTTCAGTTC  
CGTCCAAGCTGGCCAGGCACACCCAGGACGCATACCCGGAGAAAAGCCCTTTCATGCAGGATCTGCATGAGAACTTTTCC  
GTGAGACACAATCTGACAAGACATCTGAGGACGCACACCCGGGAGAAAGCCCTTTCATGCAGCATTTGTATGCGCAATTT  
TTCCCAAAGAAATAACCTGGGGAGACACCTGAAGACTCATACCCGTTGCGGCCGCCCGCCCTGGTGAAGAGCGAGCTGG  
AGGAGAAGAAGTCCGAGCTGCGGCACAAGCTGAAGTACGTGCCCCACGAGTACATCGAGCTGATCGAGATCGCCAGGAAC  
CCACCCAGGACCGCATCCTGGAGATGAAGGTGATGGAGTTCTTCATGAAGGTGTACGGCTACAGGGGAGAGCACCTGGG  
CGGAAGCAGAAAGCCTGACGGCGCCATCTATACAGTGGGCAGCCCCATCGATTACGGCGGTGATCGTGGACACAAAGCCCT  
ACAGCGCGGCTACAATCTGCCTATCGGCCAGGCCGACGAGATGCAGAGATACGTGAAGGAGAACCAGACCCGGAATAAG  
CACATCAACCCCAACGAGTGGTGAAGGTGTACCCTAGCAGCGTGACCAGTTCAAGTTCTTCTGTTGAGCGGCCACTT  
CAAGGGCAACTACAAGGCCAGCTGACCAGGCTGAACCGCAAAAACCACTGCAATGGCGCCGTGCTGAGCGTGGAGGAGC  
TGCTGATCGGCGCGGAGATGATCAAAGCCGGCACCTGACACTGGAGGAGGTGCGGCGCAAGTTCAACACCGCGGAGATC  
AACTTCTGA

**DZF-10 right ZFN**

ATGGACTACAAAGACCATGACGGTGATTATAAAGATCATGACATCGATTACAAGGATGACGATGACAAGATGGCCCCAA  
GAAGAAGAGGAAGGTGGGCCGCCCTCGAGCCCGGGGAAACGACCTTTCAGTGTAGAATATGCATGCGAAACTTCAGATCC  
CGAATCATCTGGCAAGACACACCCGGACCCATACCCGGGAAAAAGCCCTTTCATGTAGGATTTGCATGAGGAATTTAGC  
CAGTCAGCTCACCTCAAGCGGCACCTCCGGACACACAGGGGAAAAACCCCTTCCAGTGTGCATATGTATGAGGAATTT  
TTCACACCATAACAGCTGACCCGCCATCTGAAGACCCACACCCGGTGCAGGCCGCCCGCCCTGGTGAAGAGCGAGCTGG  
AGGAGAAGAAGTCCGAGCTGCGGCACAAGCTGAAGTACGTGCCCCACGAGTACATCGAGCTGATCGAGATCGCCAGGAAC  
CCACCCAGGACCGCATCCTGGAGATGAAGGTGATGGAGTTCTTCATGAAGGTGTACGGCTACAGGGGAGAGCACCTGGG  
CGGAAGCAGAAAGCCTGACGGCGCCATCTATACAGTGGGCAGCCCCATCGATTACGGCGGTGATCGTGGACACAAAGCCCT  
ACAGCGCGGCTACAATCTGCCTATCGGCCAGGCCGACGAGATGGAGGAGATACGTGGAGGAGAACCAGACACGGGATAAG

CACCTCAACCCCAACGAGTGGTGAAGGTGTACCCTAGCAGCGTGACCGAGTTCAGTTCCCTGTTCCGTGAGCGGCCACTT  
CAAGGGCAACTACAAGGCCAGCTGACCAGGCTGAACCACATCACCACCTGCAATGGCGCCGTGCTGAGCGTGGAGGAGC  
TGCTGATCGGCGCGGAGATGATCAAAGCCGGCACCCCTGACACTGGAGGAGTTCGCGCGCAAGTTCACAAACGGCGGAGATC  
AACTTCTGAT

**DZF-11 left ZFN**

ATGGACTACAAAGACCATGACGGTGATTATAAAGATCATGACATCGATTACAAGGATGACGATGACAAGATGGCCCCAA  
GAAGAAGAGGAAGGTGGGCCCGCTCGAGCCCGGGGAGCGCCGTTTCAATGCCGATTTGTATGCGGAACCTTTCCCGCG  
GTCAGGAGCTCAGGAGACACACAAGAACGCACACTGGCGAAAACCCCTTTCAGTGTAGGATCTGTATGAGGAATTTTCA  
CAACAAACAACTTGACCCGCCACCTTAGAATCACAACCTGGAGAGAAACCATTCGAATGTGCAATATGTATGCGCAACTT  
CAGCGTGGGGAATAGCCTGACTCGGCATTTGAAGACCCATACCGGTCCCGGTGCGGCCCGCCGCGCCCTGGTGAAGAGCG  
AGCTGGAGGAGAAGAAGTCCGAGCTGCGGCACAAGCTGAAGTACGTGCCCCACGAGTACATCGAGCTGATCGAGATCGCC  
AGGAACCCACCCAGGACCGCATCCTGGAGATGAAGGTGATGGAGTTCTTCAATGAAGGTGTACGGCTACAGGGGAGAGCA  
CCTGGGCGGAAGCAGAAAGCCTGACGGCGCCATCTATACAGTGGGCAGCCCCATCGATTACGGCGTGATCGTGGACACAA  
AGGCCTACAGCGCGGCTACAATCTGCCTATCGGCCAGGCCGAGATGGAGAGATACGTGGAGGAGAACCAGACACGG  
GATAAGCACCTCAACCCCAACGAGTGGTGAAGGTGTACCCTAGCAGCGTGACCGAGTTCAAGTTCCTGTTCCGTGAGCGG  
CCACTTCAAGGGCAACTACAAGGCCAGCTGACCAGGCTGAACCACATCACCACCTGCAATGGCGCCGTGCTGAGCGTGG  
AGGAGCTGCTGATCGGCGCGGAGATGATCAAAGCCGGCACCCCTGACACTGGAGGAGGTGCGGCGCAAGTTCACAAACGGC  
GAGATCAACTTCTGA

**DZF-11 right ZFN**

ATGGACTACAAAGACCATGACGGTGATTATAAAGATCATGACATCGATTACAAGGATGACGATGACAAGATGGCCCCAA  
GAAGAAGAGGAAGGTGGGCCCGCTCGAGCCCGGGGAAAGACCCCTTCCAGTGTAGAATTTGCATGCGCAATTTTAGCAAGA  
AGGACCATTTGCATAGACATACCGAACCATACTGGGGAGAAGCCTTTCCAGTGGCGCATCTGCATGCGGAATTTTCAGC  
CAGCGGTCCGATCTCACCCGACACCTGCGGACCCACACAGGTGAAAAGCCTTTTCAATGTGCGGATATGCATGAGGAACCTT  
TAGTCAGAGCGGGACTCTCACTAGACATCTGAAGACGCACACCGGTCCCGGAGCGGCCCGCCGCGCCCTGGTGAAGAGCG  
AGCTGGAGGAGAAGAAGTCCGAGCTGCGGCACAAGCTGAAGTACGTGCCCCACGAGTACATCGAGCTGATCGAGATCGCC  
AGGAACCCACCCAGGACCGCATCCTGGAGATGAAGGTGATGGAGTTCTTCAATGAAGGTGTACGGCTACAGGGGAGAGCA  
CCTGGGCGGAAGCAGAAAGCCTGACGGCGCCATCTATACAGTGGGCAGCCCCATCGATTACGGCGTGATCGTGGACACAA  
AGGCCTACAGCGCGGCTACAATCTGCCTATCGGCCAGGCCGACGAGATGCAGAGATACGTGAAGGAGAACCAGACCCGG  
AATAAGCATCAACCCCAACGAGTGGTGAAGGTGTACCCTAGCAGCGTGACCGAGTTCAAGTTCCTGTTCCGTGAGCGG  
CCACTTCAAGGGCAACTACAAGGCCAGCTGACCAGGCTGAACCAGAAAACCACTGCAATGGCGCCGTGCTGAGCGTGG  
AGGAGCTGCTGATCGGCGCGGAGATGATCAAAGCCGGCACCCCTGACACTGGAGGAGGTGCGGCGCAAGTTCACAAACGGC  
GAGATCAACTTCTGA

**DZF-12 left ZFN**

ATGGACTACAAAGACCATGACGGTGATTATAAAGATCATGACATCGATTACAAGGATGACGATGACAAGATGGCCCCAA  
GAAGAAGAGGAAGGTGGGCCCGCTCGAGCCCGGGGAGAGGCCGTTTCAATGTGCGGATATGTATGAGAAAACCTTTCTGCTC  
CAAGCAAACTGAAACGGCACACCGGACTCACACCGGCGAGAAACCCCTTTCAGTGTAGAATCTGTATGCGCAACTTCTCC  
CAGAGAGAACACCTTACCCTCACTTGGCCACGCATACAGGGGAAAAGCCCTTTCAGTGGCGCATCTGCATGAGGAATTT  
CTCAGAAAAGCGGACATCTGAAGAGACACCTTAAACACATACCGGTCCCGGAGCGGCCCGCCGCGCCCTGGTGAAGAGCG  
AGCTGGAGGAGAAGAAGTCCGAGCTGCGGCACAAGCTGAAGTACGTGCCCCACGAGTACATCGAGCTGATCGAGATCGCC  
AGGAACCCACCCAGGACCGCATCCTGGAGATGAAGGTGATGGAGTTCTTCAATGAAGGTGTACGGCTACAGGGGAGAGCA  
CCTGGGCGGAAGCAGAAAGCCTGACGGCGCCATCTATACAGTGGGCAGCCCCATCGATTACGGCGTGATCGTGGACACAA  
AGGCCTACAGCGCGGCTACAATCTGCCTATCGGCCAGGCCGACGAGATGGAGAGATACGTGGAGGAGAACCAGACACGG  
GATAAGCACCTCAACCCCAACGAGTGGTGAAGGTGTACCCTAGCAGCGTGACCGAGTTCAAGTTCCTGTTCCGTGAGCGG  
CCACTTCAAGGGCAACTACAAGGCCAGCTGACCAGGCTGAACCAGAAAACCACTGCAATGGCGCCGTGCTGAGCGTGG  
AGGAGCTGCTGATCGGCGCGGAGATGATCAAAGCCGGCACCCCTGACACTGGAGGAGGTGCGGCGCAAGTTCACAAACGGC  
GAGATCAACTTCTGA

**DZF-12 right ZFN**

ATGGACTACAAAGACCATGACGGTGATTATAAAGATCATGACATCGATTACAAGGATGACGATGACAAGATGGCCCCAA  
GAAGAAGAGGAAGGTGGGCCCGCTCGAGCCCGGGGAGCGACCATTCAGTGTGCGCATATGCATGCGGAACCTTCAGTACAC  
ATGCTCACTTGACCCGACATACACGAACACACACCGGAGAGAAAACCTTTCAGTGCAGGATCTGCATGAGAAAATTTTCAGC  
CGAAGAGAAGTCTTGAAAACCCACTGCGCACACATACCGGCGAAAAGCCCTTCCAGTGGCGCATTTGCATGAGGAACCTT  
CTCAAGGAAGGATGCTCCTCACGTCACCTCAAGACGCACACCGGTCCGGGAGCGGCCCGCCGCGCCCTGGTGAAGAGCG  
AGCTGGAGGAGAAGAAGTCCGAGCTGCGGCACAAGCTGAAGTACGTGCCCCACGAGTACATCGAGCTGATCGAGATCGCC  
AGGAACCCACCCAGGACCGCATCCTGGAGATGAAGGTGATGGAGTTCTTCAATGAAGGTGTACGGCTACAGGGGAGAGCA  
CCTGGGCGGAAGCAGAAAAGCCTGACGGCGCCATCTATACAGTGGGCAGCCCCATCGATTACGGCGTGATCGTGGACACAA  
AGGCCTACAGCGCGGCTACAATCTGCCTATCGGCCAGGCCGACGAGATGCAGAGATACGTGAAGGAGAACCAGACCCGG  
AATAAGCACATCAACCCCAACGAGTGGTGAAGGTGTACCCTAGCAGCGTGACCGAGTTCAAGTTCCTGTTCCGTGAGCGG  
CCACTTCAAGGGCAACTACAAGGCCAGCTGACCAGGCTGAACCAGAAAACCACTGCAATGGCGCCGTGCTGAGCGTGG  
AGGAGCTGCTGATCGGCGCGGAGATGATCAAAGCCGGCACCCCTGACACTGGAGGAGGTGCGGCGCAAGTTCACAAACGGC  
GAGATCAACTTCTGA

**DZF-13 left ZFN**



GCCATGGACTACAAAGACCATGACGGTGATTATAAAGATCATGACATCGATTACAAGGATGACGATGACAAGATGGCCCC  
CAAGAAGAAGAGGAAGGTGGGCCCGCTCGAGCCCGGGGAGCGGCCTTCCAGTGTCCGATCTGCATGCGGAATTTTCTA  
AACATTCAAACCTGACTAGGCATACGAGGACTCATACAGGAGAGAAGCCCTCCAGTGTAGAATATGTATGCGAACTTC  
TCTCAGAGATCTGATTTGACGAGGCACTTGCGCACTCACACCGGCGAAAAACCTTCCAATGCAGAACTGCATGCGCAA  
TTTCAGCCGGCAGGATAACCTTCAGCGGCACCTGAAGACACACCTGAGGGGATCCCAGCTGGTGAAGAGCGAGCTGGAGG  
AGAAGAAGTCCGAGCTGCGGCACAAGCTGAAGTACGTGCCCCACGAGTACATCGAGCTGATCGAGATCGCCAGGAACCCC  
ACCCAGGACCGCATCCTGGAGATGAAGGTGATGGAGTTCTTCATGAAGGTGTACGGCTACAGGGGAGAGCACCTGGGCGG  
AAGCAGAAAGCCTGACGGCGCCATCTATACAGTGGGCAGCCCCATCGATTACGGCGTGATCGTGACACAAAGGCCTACA  
GCGGCGGCTACAATCTGCCTATCGGCCAGGCCGACGAGATGGAGAGATACGTGGAGGAGAACCAGACACGGGATAAGCAC  
CTCAACCCCAACGAGTGGTGAAGGTGTACCCTAGCAGCGTGACCGAGTTCAAGTTCTGTTCTGTGAGCGGCCACTTCAA  
GGCAACTACAAGGCCAGCTGACCAGGCTGAACCACATCACCAACTGCAATGGCGCCGTGCTGAGCGTGGAGGAGCTGC  
TGATCGGCGGCGAGATGATCAAAGCCGGCACCCCTGACACTGGAGGAGGTGCGGCGCAAGTTCAACAACGGCGGAGATCAAC  
TTCTGA

**DZF-13 right ZFN**

ATGGACTACAAAGACCATGACGGTGATTATAAAGATCATGACATCGATTACAAGGATGACGATGACAAGATGGCCCCCAA  
GAAGAAGAGGAAGGTGGGCCCGCTCGAGCCCGGGGAGCGACCATTCAGTGTCCGATATGCATGCGGAACCTTCAGTACAC  
ATGCTCACTTGACCCGACATACACGAACACACACCGGAGAGAAACCTTCCAGTGCAGGATCTGCATGAGAAATTTACAG  
CGAAGAGAAGTCTGGAAAACCACTGCGCACACATACCGGCGAAAAGCCGTTCCAGTGCAGCATTTCATGAGGAACCTT  
CTCAAGGAAGGATGCTCTCCACGTCCACCTCAAGACGCACCTGAGGGGATCCCAGCTGGTGAAGAGCGAGCTGGAGGAGA  
AGAAGTCCGAGCTGCGGCACAAGCTGAAGTACGTGCCCCACGAGTACATCGAGCTGATCGAGATCGCCAGGAACCCACC  
CAGGACCGCATCCTGGAGATGAAGGTGATGGAGTTCTTCATGAAGGTGTACGGCTACAGGGGAGAGCACCTGGGCGGAAG  
CAGAAAGCCTGACGGCGCCATCTATACAGTGGGCAGCCCCATCGATTACGGCGTGATCGTGACACAAAGGCCTACAGCG  
GCGGCTACAATCTGCCTATCGGCCAGGCCGACGAGATGCAGAGATACGTGAAGGAGAACCCAGACCCGGAATAAGCACATC  
AACCCCAACGAGTGGTGAAGGTGTACCCTAGCAGCGTGACCGAGTTCAAGTTCTGTTCTGTGAGCGGCCACTTCAAGGG  
CAACTACAAGGCCAGCTGACCAGGCTGAACCGCAAAACCAACTGCAATGGCGCCGTGCTGAGCGTGGAGGAGCTGCTGA  
TCGGCGGCGAGATGATCAAAGCCGGCACCCCTGACACTGGAGGAGGTGCGGCGCAAGTTCAACAACGGCGGAGATCAACTTC  
TGA
